# Supplementary material
Source: PubMed Central journal article supplement (PMC9671504)

# Suuppplemental 1: Geographic distribution with Microreact Tree of the residential addresses of health professionals, in the city of Campinas

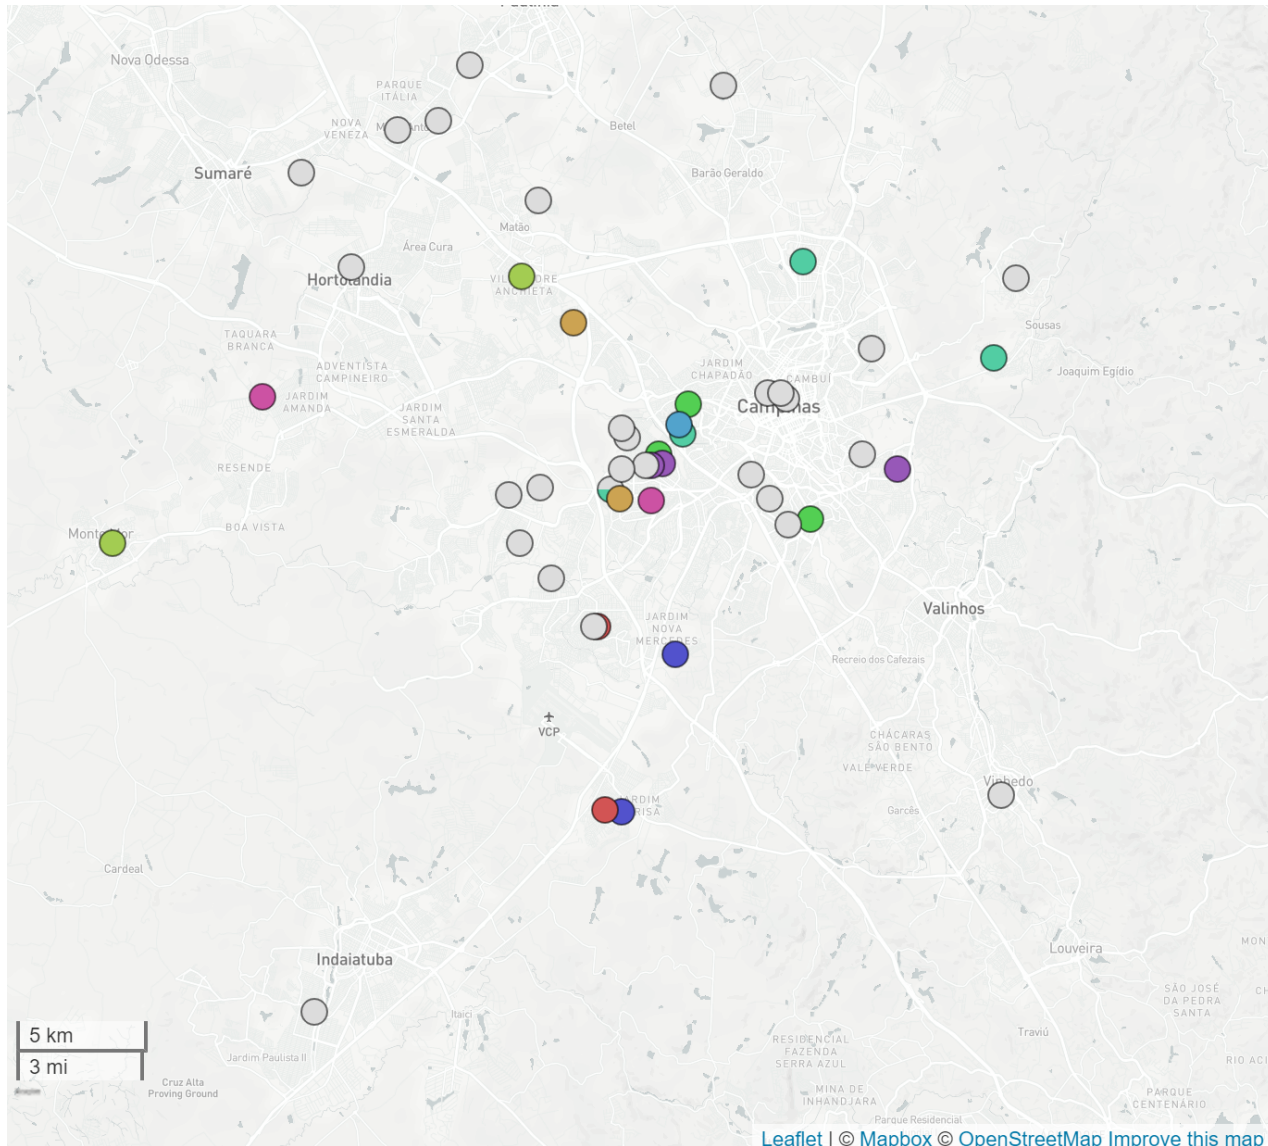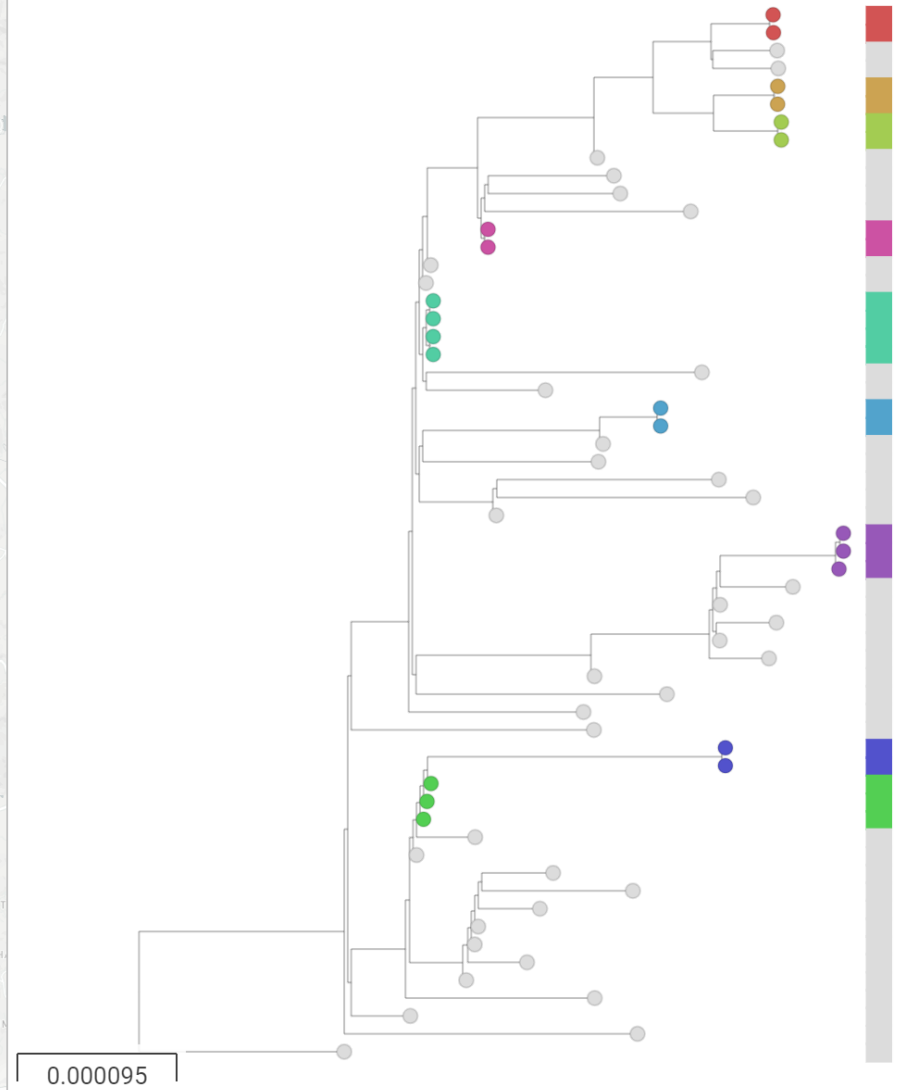

Supplement: mmc1.pdf [file mmc1.pdf]
